# Supplementary material for: Network formation by a pyrrole functionalized isophthalamide
Source: Royal Society of Chemistry journal article supplement (doi:10.1039/b612524g), 2006-01-01
Supplement: b612524g.pdf [file b612524g.pdf]

## Network formation by a pyrrole functionalized isophthalamide

Simon J. Brooks, Philip A. Gale\* and Mark E. Light

Supplementary Information

Figure S1  $^1\text{H}$  NMR spectrum of compound **2** in DMSO- $d_6$ .

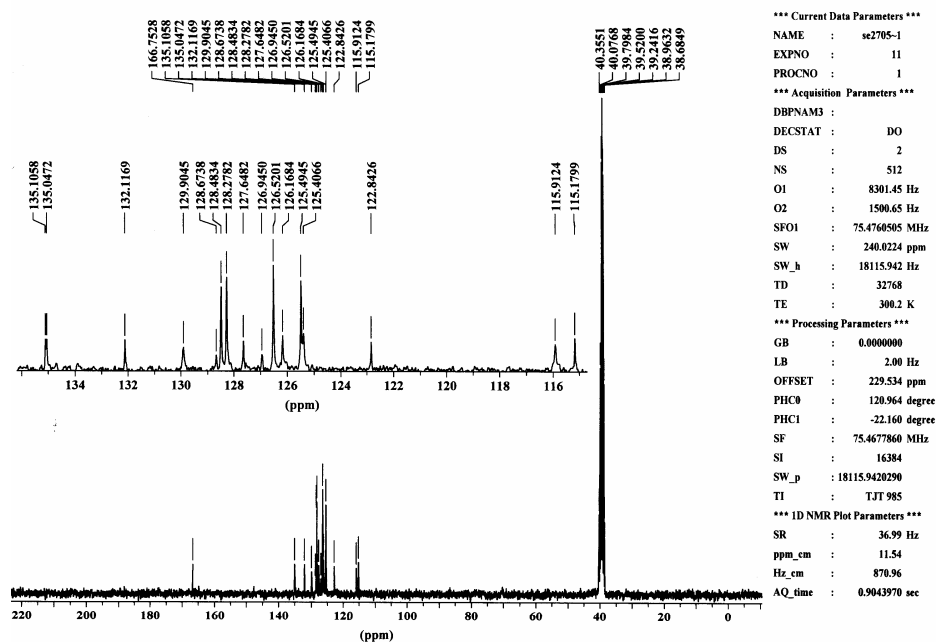

Figure S2  $^{13}\text{C}$  NMR of compound **2** in DMSO- $d_6$

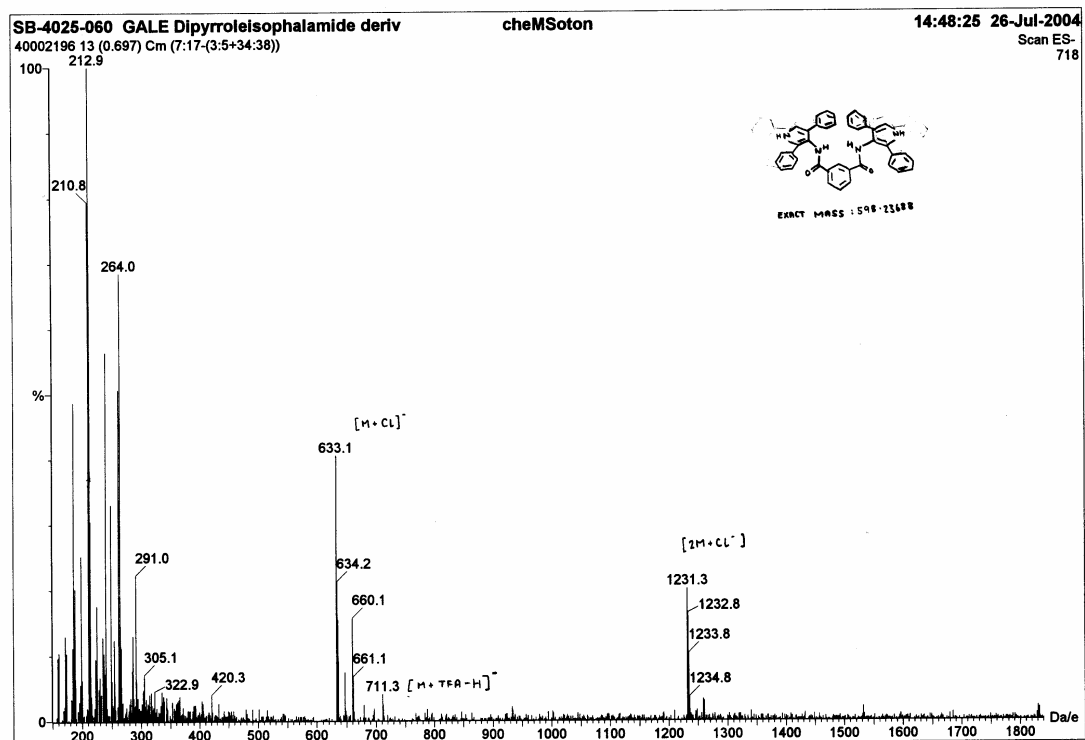

Figure S3 ESMS – of compound 2.
